# Supplementary material for: Dynamic changes of emergency visits: a retrospective observational study
Source: Research Square preprint supplement (doi:10.21203/rs.3.rs-1205273/v1), 2022-06-17
Supplement: Supplementary file 2 [file 7f590c6500534c429e2c584a.xlsx]

## Sheet: Sheet1
	Table 1: The distribution of number, gender and age of patients admitted to the emergency department of Tianjin Medical University General Hospital from 2017 to 2020 (cases, %)
	Index		2017	2018	2019	2020
	The total		310758	343498	404966	255694
	Gender
	Male		137,904（44.38）	148,616（43.27）	172,598（42.62）	118,888（46.50）
	Female		172,851（55.62）	194,882（56.73）	232,368（57.38）	136,806（53.50）
	Unknown Gender		3（0.00）	0 (0.00)	0 (0.00)	0 (0.00)
	Age
	Mean ± Standard deviation		56.27±19.445	55.55±19.661	54.98±19.851	59.24±18.291
	<20		8,368 (2.69)	10,320 (3.00)	13,919 (3.44)	4,179 (1.63)
	20～29		27,072 (8.71)	31,957 (9.30)	37,733 (9.32)	14,798 (5.79)
	30～39		42,829 (13.78)	51,164 (14.89)	64,858 (16.02)	29,934 (11.71)
	40～49		29,724 (9.56)	31,053 (9.04)	36,410 (8.99)	22,931 (8.97)
	50～59		46,654 (15.01)	50,072 (14.58)	54,465 (13.45)	38,087 (14.90)
	60～69		70,736 (22.76)	78,492 (22.85)	93,374 (23.06)	65,951 (25.79)
	70～79		46,430 (14.94)	49,692 (14.47)	58,702 (14.50)	46,330 (18.12)
	≥80		38,945 (12.53)	40,748 (11.86)	45,505 (11.24)	33,484 (13.10)
								Table 2: The disease spectrum of patients admitted to the emergency department of Tianjin Medical University General Hospital from 2017 to 2020 (cases, %)
								The disease spectrum		2017	2018	2019	2020
								Internal Medicine		209,343 (67.37)	228,249 (66.45)	263,640 (65.10)	161,304 (63.08)
								Respiratory system		64,077 (20.62)	79,143 (23.04)	96,902 (23.93)	31,880 (12.47)
								Cardiovascular system		61,260 (19.71)	60,189 (17.52)	59,151 (14.61)	46,807 (18.31)
								Digestive system		25,335 (8.15)	29,172 (8.49)	43,983 (10.86)	26,685 (10.44)
								Urinary system		10,858 (3.49)	13,497 (3.93)	14,270 (3.52)	9,051 (3.54)
								Metabolism Endocrinology		29,766 (9.58)	27,977 (8.14)	30,177 (7.45)	25,993 (10.17)
								Rheumatic immune system		4,609 (1.48)	2,589 (0.75)	2,184 (0.54)	1,692 (0.66)
								Blood system		10,731 (3.45)	13,003 (3.79)	14,027 (3.46)	15,912 (6.22)
								Nervous system		2,172 (0.70)	2,120 (0.62)	2,244 (0.55)	2,803 (1.10)
								Poisoning		535 (0.17)	559 (0.16)	702 (0.17)	481 (0.19)
								Surgery		15,083 (4.85)	14,344 (4.18)	11,853 (2.93)	14,554 (5.69)
								General Surgery		9,169 (2.95)	9,118 (2.65)	6,355 (1.57)	11,279 (4.41)
								Orthopedics		921 (0.30)	899 (0.26)	1,100 (0.27)	1,106 (0.43)
								Neurosurgery		4,993 (1.61)	4,327 (1.26)	4,398 (1.09)	2,169 (0.85)
								Obstetrics and Gynecology		983 (0.32)	1,342 (0.39)	1,072 (0.26)	602 (0.24)
								Dermatology		1,871 (0.60)	1,171 (0.34)	1,461 (0.36)	915 (0.36)
								Otorhinolaryngology		3,118 (1.00)	4,470 (1.30)	5,235 (1.29)	2,141 (0.84)
								Stomatology		282 (0.09)	326 (0.09)	391 (0.10)	397 (0.16)
								Ophthalmology		890 (0.29)	566 (0.16)	552 (0.14)	565 (0.22)
								Psychiatry		928 (0.30)	443 (0.13)	310 (0.08)	382 (0.15)
								Other		78,260 (25.18)	92,587 (26.95)	120,452 (29.74)	74,834 (29.27)
								The total		310758	343498	404966	255694
															Table 3: The distribution of the top three diseases of each common system in the disease spectrum of patients admitted to the emergency department of Tianjin Medical University General Hospital from 2017 to 2020 (cases, %)
																2017		2018		2019		2020
																Disease	Number of patients	Disease	Number of patients	Disease	Number of patients	Disease	Number of patients
															Respiratory system	Respiratory tract infection	24915	Respiratory tract infection	28159	Respiratory tract infection	34442	Respiratory tract infection	9104
																Pneumonia	8455	Pneumonia	11518	Bronchitis	15971	Pneumonia	4980
																Bronchitis	6871	Bronchitis	11374	Pneumonia	14594	Bronchitis	3077
															Cardiovascular system	Hypertension	22969	Coronary Heart Disease	20029	Coronary Heart Disease	18667	Hypertension	15411
																Coronary Heart Disease	21490	Hypertension	19697	Hypertension	18441	Coronary Heart Disease	12171
																Palpitation	3889	Palpitation	4993	Palpitation	5915	Palpitation	5028
															Digestive system	Gastritis	10980	Gastritis	12774	Gastritis	17488	Gastritis	11304
																Liver injury	3940	Diarrhea	4230	Diarrhea	4231	Gastric mucosal lesions	2826
																Diarrhea	3362	Liver injury	2317	Gastric mucosal lesions	3948	Liver injury	1504
																									Table 4: The distribution of infected patients admitted to the emergency department of Tianjin Medical University General Hospital from 2017 to 2020 (cases, %)
																									Index	2017	2018	2019	2020
																									Respiratory infection	48,702 (86.46)	58,602 (87.24)	73,530 (88.42)	20,078 (82.40)
																									Cardiovascular infection	203 (0.36)	229 (0.34)	253 (0.30)	74 (0.30)
																									Digestive infection	1,902 (3.38)	1,211 (1.80)	1,477 (1.78)	570 (2.34)
																									Urinary infection	5,329 (9.46)	6,814 (10.14)	7,673 (9.23)	3,442 (14.13)
																									Skin and soft tissue infection	190 (0.34)	314 (0.47)	225 (0.27)	202 (0.83)
																									The total	56326	67170	83158	24366
